# Supplementary material
Source: PubMed Central journal article supplement (PMC2803232)
Supplement: supp_M000729_jlr.M000729-1.pdf [file supp_M000729_jlr.M000729-1.pdf]

Primers for mutation of desnutrin plasmids.

G14A - forward 5'-atctcattcgctgcctgcggcttctc-3'

G14A - reverse 5'-gaggaagccgcaggcagcgaatgagat-3'

G16A - forward 5'-ttcgtggctgcgcttctcggggtc-3'

G16A - reverse 5'-gaccccgaggaaggcgcagccagcgaa-3'

G19A - forward 5'-tgcggcttctcgcgggtctaccacatt-3'

G19A - reverse 5'-aatgtgtagaccgcgaggaagccgca-3'

F17A - forward 5'-ttcgtggctgcggcgcctcggggctaccac-3'

F17A - reverse 5'-gtggtagaccccgagggcgcgcagccagcgaa-3'

L18A - forward 5'-tgcggcttgcgggggtctac-3'

L18A - reverse 5'-gtagaccccggcgaagccgca-3'

V20A - forward 5'-ggcttctcggggcctaccacattggc-3'

V20A - reverse 5'-gccaatgtggtaggccccgaggaagcc-3'

S47A - forward 5'-tacggggccgcggcaggggcg-3'

S47A - reverse 5'-cgcccctgccggccccgta-3'

D166A - forward 5'-cgctatgtggctggcggcatt-3'

D166A - reverse 5'-aatgccgcagccacatagcg-3'

S406A - forward 5'-cgacgtgccaggctctgccctctgtg-3'

S406A - reverse 5'-cacagagggcagagcctgggcacgtcg-3'

S430A - forward 5'-cgaacaacctcgactgggggacgcg-3'

S430A - reverse 5'-cgcgtccccagtgcgaggtgtttcg-3'
