# Supplementary material
Source: PubMed Central journal article supplement (PMC2803232)
Supplement: supp_M000729_jlr.M000729-2.pdf [file supp_M000729_jlr.M000729-2.pdf]

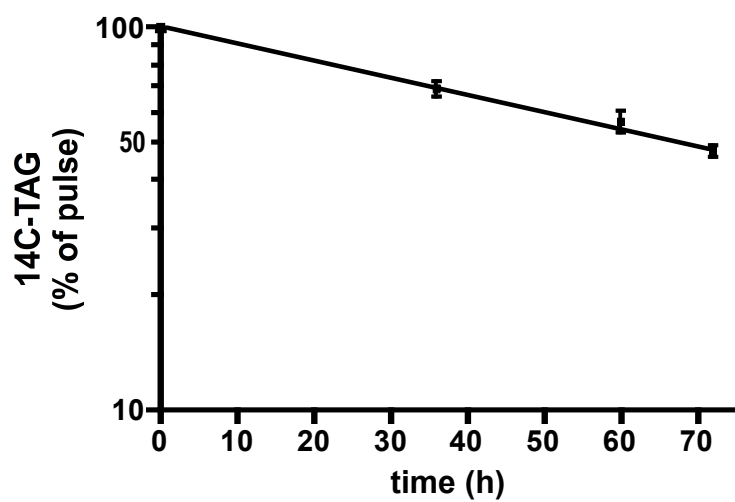

Supplementary Figure 2. <sup>14</sup>C-TAG remaining in control COS-7 cells at the time points indicated during the chase period, following pulse labeling of cells with <sup>14</sup>C-palmitate for 4h as described in the Methods section.
